1 **Neighbor signals perceived by phytochrome B increase thermotolerance in**  
2 **Arabidopsis**

3

4

5 **Denise Arico<sup>1</sup>, Martina Legris<sup>2</sup>, Luciana Castro<sup>1</sup>, Carlos Fernando Garcia<sup>3</sup>,**  
6 **Aldana Laino<sup>3</sup>, Jorge Casal<sup>2,4</sup> and Maria Agustina Mazzella<sup>1†</sup>.**

7

8

9 <sup>1</sup> Instituto de Investigaciones en Ingeniería Genética y Biología Molecular, Dr. Héctor  
10 Torres (INGEBI-CONICET), Vuelta de Obligado 2490, Buenos Aires, 1428,  
11 Argentina.

12 <sup>2</sup> Fundación Instituto Leloir (FIL), Av. Patricias Argentinas 435, 1405, Buenos Aires,  
13 Argentina.

14 <sup>3</sup> Instituto de Investigaciones Bioquímicas de La Plata “Profesor Doctor Rodolfo R.  
15 Brenner” (INIBIOLP), CCT-La Plata CONICET-UNLP, 60 y 120 (1900) La Plata,  
16 Argentina.

17 <sup>4</sup> IFEVA, Facultad de Agronomía, Universidad de Buenos Aires and CONICET,  
18 Buenos Aires, 1417, Argentina.

19

20 † To whom correspondence should be addressed. INGEBI Vuelta de Obligado 2490,  
21 Buenos Aires, 1428, Argentina. Telephone: 54 11 4783-2871; Fax: 54 11 4786-8578 e-  
22 mail: [mazzella@dna.uba.ar](mailto:mazzella@dna.uba.ar) and [mazzellaagus@gmail.com](mailto:mazzellaagus@gmail.com)

23

24

25

26

27

28

29 **Abstract**

30

31 Due to the preeminence of reductionist approaches, our understanding of plant  
32 responses to combined stresses is limited. We speculated that light-quality signals of  
33 neighboring vegetation might increase susceptibility to heat shocks because shade  
34 reduces tissue temperature and hence the likeness of heat shocks. In contrast, plants of  
35 *Arabidopsis thaliana* grown under low red / far-red ratios typical of shade were less  
36 damaged by heat stress than plants grown under simulated sunlight. Shade reduces the  
37 activity of phytochrome B (phyB) and the *phyB* mutant showed high tolerance to heat  
38 stress even under simulated sunlight. The enhanced heat tolerance under low red / far-  
39 red ratios failed in a multiple mutant of PHYTOCHROME INTERACTING FACTORS.  
40 The *phyB* mutant showed reduced expression of several fatty acid desaturase (FAD)  
41 genes, proportion of fully unsaturated fatty acids and electrolyte leakage of membranes  
42 exposed to a heat shock. Activation of phyB by red light also reduced thermotolerance  
43 of dark-grown (etiolated) seedlings but not via changes in *FAD* gene expression and  
44 membrane stability. We propose that the reduced photosynthetic capacity linked to  
45 thermotolerant membranes would be less costly under shade, where the light input itself  
46 limits photosynthesis.

47

48

49

50

51 **Keywords:** Arabidopsis, heat shock, light, membrane stability, phyB.

## 52 **1 INTRODUCTION**

53

54 Although most studies dealing with plant responses to environmental threats consider  
55 one source of stress at the time, plants can often be exposed simultaneously to multiple  
56 stresses. The impact of different stresses is not necessarily additive and in some cases  
57 one stress increases the impact of the other. For example, the damage caused by the  
58 combination of drought and salinity or drought and heat results in growth reductions  
59 that are more severe than those caused by the sum of the effects of each stress in  
60 isolation (Rizhsky, Liang & Mittler, 2002; Ahmed et al., 2013). Similarly, heat stress  
61 facilitates pathogen spread causing susceptibility to diseases (Luck et al., 2011; Nicol,  
62 Turner, Coyne, Nijs & Hockland, 2011). Conversely, in other cases one stress reduces  
63 the impact of the other. For instance, wounding can increase salt tolerance (Capiati, País  
64 & Téllez-Iñón, 2006) and ultraviolet radiation, although potentially harmful, can protect  
65 plants against herbivorous insects (Rousseaux et al., 2004; Caputo, Rutitzky & Ballaré,  
66 2006). Therefore, plants are likely to have developed physiological and molecular  
67 mechanisms of protection against specific combinations of stresses, but these processes  
68 can remain hidden in studies involving single stress factors (Pandey, Ramegowda &  
69 Senthil-Kumar, 2015).

70 The shade imposed by neighboring vegetation reduces the photosynthetically  
71 active radiation available for the plants within the canopy, and can eventually  
72 compromise their survival. Plants respond to the threat associated to neighbors by  
73 inducing shade-avoidance responses (such as enhanced stem and petiole elongation),  
74 and/or acclimation responses that increase the chances of survival under limiting light  
75 (Casal, 2013; Gommers, Visser, Onge, Voeselek & Pierik, 2013). In *Arabidopsis*,  
76 light/shade signals are perceived mainly by phytochrome B (phyB) and cryptochrome 1  
77 (cry1). Phytochromes are a family of five members in *Arabidopsis* (phyA-phyE). They  
78 have two inter-convertible forms: red light transforms the inactive Pr form into the  
79 active Pfr form, while far-red light converts Pfr back to the Pr form (Burgie & Vierstra,  
80 2014). Therefore, the activity of phyB increases with the red / far-red ratio of the light,  
81 which is high (approx 1.1) in open places and becomes gradually depleted with the  
82 proximity of neighboring vegetation reflecting far-red light and under the canopy, which  
83 also transmits far-red more efficiently than red light (Casal, 2013; Gommers et al.,  
84 2013). There are two canonical cryptochromes in *Arabidopsis* (cry1-cry2), which  
85 increase their activity in response to blue light (Yu, Liu, Klejnot & Lin, 2010). phyB

86 reduces the activity of the bHLH transcription factors PHYTOCHROME  
87 INTERACTING FACTOR 3, (PIF3), PIF4, PIF5 and PIF7 by lowering their abundance  
88 and/or DNA binding capacity (Lorrain, Allen, Duek, Whitelam & Fankhauser, 2008;  
89 Park et al., 2012). cry1 also reduces the abundance of PIF4 and PIF5 (de Wit et al.,  
90 2016; Pedmale et al., 2016). Therefore, the weaker activity of these photo-sensory  
91 receptors under vegetation shade, increases the activity of PIF3, PIF4, PIF5 and PIF7,  
92 which promote stem growth and other shade-avoidance responses (Lorrain et al., 2008;  
93 Hornitschek et al., 2012; Li et al., 2012; Leivar & Monte, 2014). The lower activities of  
94 phyB and cry1 under shade also lead to stronger nuclear accumulation of  
95 CONSTITUTIVE PHOTOMORPHOGENIC 1 (COP1), which enhances the  
96 degradation of LONG HYPOCOTYL IN FAR RED LIGHT 1 (HFR1) (Pacín, Legris &  
97 Casal, 2013; Pacín, Semmoloni, Legris, Finlayson & Casal, 2016) a negative regulator  
98 of the activity of PIFs.

99 High temperatures are another source of stress as they inhibit photosynthesis,  
100 damage cell membranes and cause cell death (Liu & Huang, 2000; Djanaguiraman,  
101 Boyle, Welti, Jagadish & Prasad, 2018). The expected increases in temperature over the  
102 following years predict a more severe and frequent incidence of heat stress (Hatfield &  
103 Prueger, 2015). Plants possess an inherent basal thermotolerance and also have the  
104 ability to acquire thermotolerance by the exposure to a gradual sub-lethal high  
105 temperature (heat acclimation) (Hong, Lee & Vierling, 2003). Plants cope with high  
106 temperatures by altering their physiological, morphological, biochemical and molecular  
107 status during acclimation (Bita & Gerats, 2013). For instance, plants respond to non-  
108 stressing high temperatures by increasing stem and petiole elongation and leaf  
109 hyponasty; i.e. changes that enhance leaf cooling capacity reducing the probability of  
110 stress by further temperature rises (Crawford, McLachlan, Hetherington & Franklin,  
111 2012). Plant cell membranes are direct targets of heat stress, which increase leakage of  
112 electrolytes out of the cell (Wahid, Gelani, Ashraf & Foolad, 2007). The degree of  
113 unsaturated fatty acids in the membrane is inversely correlated with growth  
114 temperatures. A reduced proportion of polyunsaturated fatty acids in the membrane  
115 favors seedling growth at elevated temperatures (Falcone, Ogas & Somerville, 2004),  
116 but reduces seedling growth in the absence of heat stress (Routaboul, Fischer & Browse,  
117 2000). Heat stress also promotes the immediate expression of heat-shock proteins that  
118 act to prevent and restore cell damage and preserve homeostasis (Yángüez, Castro-Sanz,  
119 Fernández-Bautista, Oliveros & Castellano, 2013; Wang et al., 2017).

120           The aim of this study was to investigate whether the low red / far-red ratio  
121 signals of neighboring vegetation perceived by phyB affect thermotolerance. There are  
122 several reasons that justify the proposed analysis. First, there is ecological convergence  
123 of the light and temperature cues. For instance, canopy shade reduces the irradiance and  
124 temperature levels experienced by plants (Legris, Nieto, Sellaro, Prat & Casal, 2017).  
125 Second, plant population responses to global warming can be modified by light, as in  
126 forest understory, the largest changes in thermophilization of species (the replacement  
127 of cold-adapted understory species with warm-adapted species) occurs more intensively  
128 when higher light and temperature levels coincide (De Frenne et al., 2015). Third, there  
129 is molecular convergence in the plant perception and signaling of light and temperature  
130 cues. Noteworthy, phyB functions not only as a light receptor but also as a temperature  
131 sensor, which is inactivated by far-red light and also by warm temperatures (Jung et al.,  
132 2016; Legris et al., 2016). PIF4 (Koini et al., 2009; Franklin et al., 2011; Lau et al.,  
133 2018), HFR1 (Foreman et al., 2011) and COP1 (Kim et al., 2017; Park, Lee, Ha, Kim &  
134 Park, 2017), which are described above as components of the signaling network  
135 involved in the responses to the degree of shade, play a role in thermomorphogenesis.  
136 Fourth, heat shocks modulate light signaling in etiolated *Arabidopsis* seedlings  
137 (Karayekov, Sellaro, Legris, Yanovsky & Casal, 2013), suggesting that the reciprocal  
138 control of thermotolerance by light signals could also occur. Fifth, a recent work has  
139 reported enhanced thermotolerance of a *phyB* mutant (Song, Liu, Hu & Wu, 2017). We  
140 found that neighbor signals perceived by phyB increase thermotolerance in *Arabidopsis*  
141 at least in part by adjusting membrane function.

142

## 143 **2 MATERIALS AND METHODS**

144

### 145 **2.1 Plant Material**

146 The wild-type accessions of *Arabidopsis thaliana* used in this study were Landsberg  
147 *erecta* (*Ler*) and Columbia (*Col*). The *phyB* (*phyB-5*)(Reed, Nagpal, Poole, Furuya &  
148 Chory, 1993) and *cry1 cry2* (*hy4-2.23n*, *fha-1*) (Casal & Mazzella, 1998) mutants are in  
149 the *Ler* background. The *phyA-211* (Reed et al., 1993), *phyB-9*,(Reed, Nagatani, Elich,  
150 Fagan & Chory, 1994), *hy5-211* (Shin, Park & Choi, 2007), *cry1-1*, *cry2-1*(Guo, Yang,  
151 Mockler & Lin, 1998), *pif1-1*, *pif3-3* (Monte et al., 2004), *pif4-101*, *pif5-3* (Lorrain et  
152 al., 2008), *pif1 pif3*, *pif4 pif5*, *pif3 pif4*, *pif1 pif3 pif5*, *pif3 pif4 pif5*, and *pif1 pif3 pif4*

153 *pif5* (Leivar et al., 2008); *hfr-101* (Duek, Elmer, Van Oosten & Fankhauser, 2004),  
154 *cop1-4*, *cop1-6* (McNellis, 1994), *spa1-1*, *spa2-1*, *spa3-1*, *spa4-1*, *spa1 spa2 spa3* and  
155 *spa1 spa2 spa4* (Laubinger, Fittinghoff & Hoecker, 2004) mutants are in the Col  
156 background. Seeds were surface sterilized (4 h of exposure to the fumes produced by  
157 1.25% HCl/NaClO) and sown on 0,8% w/v agar plates (experiments with etiolated  
158 seedlings) or 0,8% w/v agar plates containing one-half-strength Murashige and Skoog  
159 basal medium pH 5.7 (MS) (experiments with light-grown seedlings). After 3 d at 4 °C  
160 in darkness, the seeds were exposed to a red-light pulse for 2 h to promote germination.

161

## 162 **2.2 Light conditions**

163

164 White light (WL) was provided by fluorescent lamps (Philips, 80  $\mu\text{mol m}^{-2} \text{s}^{-1}$ ) and red  
165 light and red light (12  $\mu\text{mol m}^{-2} \text{s}^{-1}$ ) was provided by fluorescent lamps (Philips)  
166 combined with red, orange and yellow filters (LEE #106, #105 and #101 respectively).  
167 For the WL treatments supplemented with far-red light (WL+FR), WL was given from  
168 above as described and far-red light (30  $\mu\text{mol m}^{-2} \text{s}^{-1}$ ) was provided from below by  
169 incandescent lamps filtered with a red acetate filter and six blue acrylic filters (Paolini  
170 2031, La Casa del Acetato, Buenos Aires, Argentina) and a water filter.

171

## 172 **2.3 Temperature treatments**

173

174 Plants were grown at 22 °C. For heat-shock treatments the boxes containing the  
175 seedlings were placed during 45 min in a shaker or 90 min in water bath, both at 45 °C  
176 in darkness. For acclimation to heat, the boxes containing seedlings were placed during  
177 90 min in a shaker at 35 °C in darkness.

178

## 179 **2.4 Scoring of damage**

180

181 At the rosette stage, a plant was considered damaged when it showed at least one  
182 cotyledon completely bleached. At the seedling stage survival rates were assessed by

183 recording the proportion of seedlings that generated the first pair of leaves 1 week after  
184 the heat shock.

185

## 186 **2.5 Electrolyte leakage**

187

188 Approximately 200 mg of the seedlings were harvested after the heat shock challenge,  
189 rinsed twice with demineralized water and subsequently floated on 10 ml of  
190 demineralized water at room temperature. Electrolyte leakage in the solution was  
191 measured 24 h later by using a conductimeter (Corning TDS-60). Data are presented  
192 relative to total conductivity obtained after boiling the samples at 100° C for 15 min  
193 (Wang et al., 2013).

194

## 195 **2.6 Quantitative real time PCR (qPCR)**

196

197 Total RNA was extracted using Trizol Reagent (Life Technologies Inc., USA) and  
198 treated with RQ1 RNase-free DNase I (Promega, USA). 3 µg of total RNA were  
199 reverse-transcribed in a 25 µl reaction using MMLV reverse transcriptase (Promega,  
200 USA) according to the manufacturer's instructions, using oligo (dT) primers. cDNA  
201 were diluted 1:40 before qPCR. qPCR reactions were performed in a DNA Engine  
202 Opticon 2 System (MJ Research, USA) using the 5x HOT FIREPol EvaGreen® qPCR  
203 Mix Plus (NO ROX) kit (Solis BioDyne, Estonia). The primers for *FAD2* (AT3G12120)  
204 were 5'-CCTTCCTCCTCGTCCCTTAC-3' and 5'-CTCTTTTCGAGGGATCCAGTG-3'  
205 and for *FAD6* (AT4G30950) were 5'-CCGTGGTATCTGCTACCGTT-3' and 5'-  
206 TAGGAAGGCGAGAGTACCCA-3' (Shen et al., 2010); primers for *FAD5*  
207 (AT3G15850) were 5'-AACAACCTGGTGGGTAGCAGC-3' and 5'-  
208 ACCGATGGCTTGAAGGAAC-3' (Luo et al., 2010); primers for *FAD7* (AT3G11170)  
209 were 5'-TGTTTGGCCTCTCTATTGGC-3' and 5'-AAGGGTATGCAAGCATCACG -  
210 3'; primers for *FAD8* (AT5G05580) were 5'-GAGGCTGAACAGTGTGGCT-3' and 5'-  
211 CTTGTAGATGCTTTCAGGCAA-3'. *ACTIN 8* (AT1G49240) was used as  
212 normalization control (Mazzella et al., 2005). The conditions for PCR were optimized  
213 with respect to primer concentrations, primer annealing temperatures and duration of

214 steps. Cycling conditions were 95°C for 15 min followed by 38 cycles of 15 s at 94°C,  
215 12 s at 60°C, 12 s at 72°C. PCR for each gene fragment was performed alongside  
216 standard dilution curves of cDNA pool. All gene fragments were amplified in duplicate  
217 from the same RNA preparation, and the mean value was considered.

## 218 **2.7 Lipid Extraction and Fatty Acid Analysis**

219

220 For each sample, total lipids were extracted with methanol/chloroform mix (2/1 v/v)  
221 using the procedure described by Bligh and Dyer (Bligh & Dyer, 1959). Lipid extracts  
222 were dried, weighted, suspended in 2 mL of a fresh solution of 10% KOH in ethanol  
223 and saponified for 60 min at 80 °C using stoppered glass tubes. Two ml of hexane were  
224 added and fatty acids were extracted by shaking. The upper organic phase (non-  
225 saponified) was discarded. The aqueous layer was acidified with 1.5 ml of concentrated  
226 HCl and fatty acids were extracted twice with 1.5 ml hexane. Extracts containing total  
227 free fatty acids were dried under a nitrogen stream, dissolved in 1.5 ml BF<sub>3</sub> (10 % in  
228 methanol) and 1.5 ml benzene, and esterified by heating to 100 °C and shaking for 1 h.  
229 Fatty acid methyl ester (FAME) were extracted twice with hexane and washed with  
230 distilled water. After washing, the organic phase was evaporated under a nitrogen  
231 stream, re-dissolved in hexane, and analysed by GLC. One µl of FAME solution was  
232 injected into an Omegawax X250 (Supelco Inc., Bellefonte, PA, USA) capillary column  
233 (30 m × 0.25 mm; 0.25-mm film) in a Hewlett Packard HP-6890 (Santa Clara, CA,  
234 USA) chromatograph equipped with a flame ionization detector. The column  
235 temperature was programmed for a linear increase of 3 °C min<sup>-1</sup> from 175 to 230 °C.  
236 The chromatographic peaks of FAME were identified by comparing their retention times  
237 with standards under the same conditions.

238

## 239 **3 RESULTS**

240

### 241 **3.1 Neighbor signals increase the tolerance to a heat shock**

242

243 In order to study whether neighbor signals affect thermotolerance, Arabidopsis  
244 seedlings grown for 9 d under either WL or WL+FR (high, or low red / far-red ratios,  
245 respectively) were exposed to a heat shock (45 °C for 45 min) and plant damage was



246 recorded after 5 d of recovery at 22 °C under WL or WL+FR according to the previous  
247 growth condition (see protocol in Figure S1a). Wild-type (WT) seedlings either of the  
248 *Ler* or *Col* background showed less frequent damage (enhanced thermotolerance) when  
249 grown under WL+FR simulating the presence of neighboring vegetation than under WL  
250 (Figure 1a,b,d,e).

251

### 252 **3.2 *phyB* activity reduces the tolerance to a heat shock**

253

254 In principle, the action of supplementary far-red light (i.e., WL+FR compared to WL)  
255 could be mediated by different perception and signaling steps as low red / far-red ratios  
256 reduce the proportion of active *phyB* but increases *phyA* activity (Franklin, 2003;  
257 Rausenberger et al., 2011; Trupkin, Legris, Buchovsky, Tolava Rivero & Casal, 2014)  
258 and the relative excitation of photosystems I and II (Anderson, Chow & Park, 1995).  
259 Compared to the WT, the *phyA* mutant showed no difference under WL and an  
260 enhanced response to WL+FR (Figure 1a,d). The *phyA phyB* double mutant and the  
261 *phyA* mutant showed similar thermotolerance under WL+FR and this high  
262 thermotolerance was already observed in seedlings of *phyA phyB* grown under WL  
263 (Figure 1a,d). These results indicate that in the WT, WL+FR increases thermotolerance  
264 by lowering *phyB* activity. Furthermore, the enhanced *phyA* activity caused by  
265 supplementary far-red light only slightly counteracted the promotion of thermotolerance  
266 caused by lowering *phyB* activity. Since the response of *phyA phyB* to WL+FR  
267 compared to WL was not significant, we obtained no evidence for a role of changes in  
268 photosystem balance (Figure 1a).

269 If the above conclusion is correct, the *phyB* mutation should be enough by itself  
270 to increase thermotolerance under WL (i.e. in the absence of neighbor signals). This  
271 expectation was met by the data obtained with two independent alleles (Figure 1).  
272 Under WL, the damage of the *cry1 cry2* double mutant was similar to that observed for  
273 the WT (Figure 1c,f).

274

### 275 **3.3 Enhanced thermotolerance under low red / far-red ratios requires PIFs**

276

277 Since *phyB* negatively regulates PIFs, the reduced activity of *phyB* under low red / far-  
278 red ratios increases the activity of PIFs (Lorrain et al., 2008; Li et al., 2012). Under WL,  
279 thermotolerance of the *pif1 pif3 pif4 pif5* quadruple mutant was similar to that of the

280 WT; however, thermotolerance did not increase in *pif1 pif3 pif4 pif5* in response to  
281 WL+FR (Figure 1b,e). This suggests that in the WT, the increased thermotolerance  
282 under low red / far-red ratios is mediated by increased activity of PIFs. HFR1 is a  
283 negative regulator of the effects of PIFs on growth (Hornitschek, Lorrain, Zoete,  
284 Michielin & Fankhauser, 2009) but the *hfr1* mutation did not affect thermotolerance  
285 (Figure 1b,e).

286

### 287 **3.4 phyB decreases thermostability of the plasma membranes**

288

289 To test whether the increased damage observed in the WT compared to the *phyB* mutant  
290 is associated with changes in the functional integrity of plasma membranes, we  
291 evaluated electrolyte leakage in seedlings grown under WL, immediately after exposure  
292 to a heat shock of 45 min at 45 °C, compared to the seedlings that remained at 22 °C as  
293 controls (Figure S1a). Both in the *Ler* and *Col* backgrounds, the WT, *phyB* mutants and  
294 *cry1 cry2* mutants showed similar levels of electrolyte leakage in the absence of a heat  
295 shock (22 °C) (Figure 2). After exposure to the heat shock, the WT and the *cry1 cry2*  
296 double mutant increased the leakage of electrolytes, more than the *phyB* mutant (Figure  
297 2), indicating that *phyB* enhances the heat damage of the plasma membrane.

298

### 299 **3.5 phyB increases polyunsaturated fatty acids**

300

301 Differences in membrane thermostability can result from changes in the lipid profile  
302 (Falcone et al., 2004). We therefore investigated fatty acid composition in seedlings  
303 harvested immediately prior the time when they had to be exposed to the heat shock in  
304 the above experiments (Figure S1a). Compared to the WT, the *phyB* mutant showed a  
305 significant reduction in total unsaturated fatty acids (16:3 and 18:3), a significant  
306 increase in partially unsaturated (18:1 and 18:2) but no differences in saturated (14:0  
307 and 16:0) fatty acids (Figure 3a,b). The *cry1 cry2* double mutant showed an overall  
308 level of total unsaturated fatty acids similar to the WT (Figure 3b), an increment only in  
309 18:2 and a slight reduction in 16:3 (Figure 3a). We are currently conducting  
310 experiments to determine unsaturation fatty acid changes in WT and *pifq mutant* shaded  
311 plants.

312

### 313 **3.6 phyB increases FAD expression**

314

315 In Arabidopsis, seven fatty acid desaturase (FAD) enzymes are involved in the different  
316 steps leading to the generation of trienoic acids (Shanklin & Cahoon, 1998). Two of  
317 them, FAD2 and FAD3, localize to the endoplasmic reticulum, whereas the other five,  
318 FAD4, FAD5, FAD6, FAD7 and FAD8, localize to the chloroplast (Wallis & Browse,  
319 2002). Given the observed changes in fatty acid composition, we evaluated whether the  
320 *phyB* mutation affects the expression of five *FAD* genes by real time PCR, in seedlings  
321 grown under WL and harvested immediately prior the time corresponding to the heat  
322 shock in above experiments (Figure S1a). The expression of *FAD2*, *FAD5*, *FAD6*,  
323 *FAD7* and *FAD8* was significantly lower in the *phyB* mutant than in the WT (Figure  
324 4a).

325 At least the expression of *FAD2* and *FAD5* was reduced in WT seedlings grown  
326 under WL+FR compared to WL (Figure 4b). The response of *FAD* genes to  
327 supplementary far-red light appears to require prolonged exposures to low red / far-red  
328 ratios because published data indicate that short-term treatments have no effects (*FAD*  
329 expression mean  $\pm$  standard error. *FAD2*: WL= 12,30 $\pm$  0.08, WL+FR= 12,30 $\pm$  0.08;  
330 *FAD5*: WL= 11,76 $\pm$  0.03, WL+FR= 11,91 $\pm$  0.05; *FAD6*: WL= 11,33 $\pm$  0.01, WL+FR=  
331 11,69 $\pm$  0.02; *FAD7/8*: WL= 11,00 $\pm$  0.10, WL+FR= 11,36 $\pm$  0.05, data from Leivar *et al.*  
332 2012).

333

### 334 **3.7 Light reduces thermotolerance in etiolated seedlings**

335

336 To further characterize the system we analyzed the effect of phyB on thermotolerance in  
337 dark-grown etiolated seedlings. No acclimation was necessary to see a basal level of  
338 thermotolerance in light-grown seedlings (Figure 1); but in etiolated seedlings  
339 acclimation under non lethal warm temperatures was necessary. We exposed 4-day-old  
340 etiolated seedlings to a heat shock of 90 min at 45 °C followed by a 7 d recovery period  
341 before scoring survival. Prior to the heat shock the seedlings were grown for 2 d under  
342 four different conditions that resulted from the combination of a daily mild heat shock  
343 of 90 min at 35 °C to acclimate the seedlings to high temperatures and 6 h of WL  
344 (protocol in Figure S1b): the controls (no light and no acclimation treatments), the  
345 acclimated seedlings, the light-treated seedlings, and the acclimated and light-treated  
346 seedlings; although for simplicity we referred here to etiolated seedlings to those  
347 exposed to light pretreatment that were partially de-etiolated. No plant survival (0 %  $\pm$ 0)

348 was observed when 4-day-old etiolated seedlings were exposed to the 45 °C heat shock  
349 without acclimation. Significant survival was observed among the seedlings that were  
350 acclimated to elevated temperatures but exposure to light during the acclimation period  
351 significantly reduced subsequent seedling survival (Figure 5a).

352

### 353 **3.8 In etiolated seedlings, light reduction of induced thermotolerance requires** 354 **phyB, PIFs, and COP1**

355

356 Survival of temperature acclimated seedlings was increased in the *phyB* mutant  
357 background (*phyB* and *phyA phyB* mutants) and *cry1 cry2* double mutants with or  
358 without light treatment, while *phyA* showed the same response as the WT (note that a  
359 light treatment to induce germination was given even to the dark controls) (Figure 5a).  
360 The *cry1* simple mutants showed WT survival rates and *cry2* mutants show reduced  
361 survival, particularly when exposed to light, but the *cry1 cry2* double mutants showed  
362 increased survival (Figure 5a), indicating redundancy between *cry1* and *cry2* (Mockler,  
363 Guo, Yang, Duong & Lin, 1999; Mazzella & Casal, 2001). The difference in plant  
364 survival between acclimated seedlings exposed or not exposed to the light treatment is  
365 slightly reduced on *phyB* mutants and significantly reduced on *phyA phyB* mutants  
366 (Figure 5c).

367 Since *phyB* is activated by red light, we tested the same protocol but replacing  
368 the period of 6 h of WL by red light. Plant survival was reduced in the WT exposed to  
369 red light after each daily pre-treatment with warm temperature and this effect was  
370 absent in the *phyB* mutant background (Figure 5b). The plant survival response to red  
371 light was not significantly different from zero in *phyB* but retained a WT magnitude in  
372 *phyA* (Figure 5d).

373 Compared to the WT, in darkness, plant survival was reduced in the *hy5*, *pif1*  
374 *pif3 pif5*, *pif3 pif4 pif5*, *pif1 pif3 pif4 pif5*, *cop1-4*, *cop1-6*, and *spa1 spa2 spa4* mutants  
375 (Figure 5b). Noteworthy, the *cop1*, *pif1 pif3 pif5*, *pif3 pif4 pif5* and *pif1 pif3 pif4 pif5*  
376 mutants showed an inverted response to light, which actually increased rather than  
377 reduced plant survival in these genotypes (Figure 5d).

378

### 379 **3.9 phyB and PIFs do not affect membrane thermotolerance in etiolated seedlings**

380

381 To investigate if the mechanisms that lead to a phyB-mediated reduction in heat  
382 tolerance in etiolated seedlings were similar to those described above for in fully de-  
383 etiolated seedlings, we analyzed electrolyte leakage and the expression of *FAD* genes in  
384 etiolated seedlings. The 45 °C heat shock increased leakage compared to the seedlings  
385 that did not receive this treatment, but no effects of the acclimation or light pre-  
386 treatments and of the *phyB* and *pif1 pif3 pif4 pif5* mutations were observed (Figure S2a),  
387 despite the large effects of these variants on seedling survival (Figure 5). No consistent  
388 effects of light or of the *phyB* or *pif1 pif3 pif4 pif5* mutations were observed on the  
389 expression of *FAD* genes (Figure S2b).

390

#### 391 **4 DISCUSSION**

392

393 We show that *Arabidopsis* rosettes grown under low red / far red ratios, typical of  
394 places with close neighbors, are more tolerant to a heat shock than those grown under  
395 high red / far-red ratios, typical of un-shaded spots (Figure 1). The *phyB* mutant showed  
396 constitutively high thermotolerance, unaffected by the red / far-red ratio (Figure 1).  
397 Thus, the increased thermotolerance under low red / far-red ratios is mediated by a  
398 reduction in phyB activity. Although low blue light and blue / green ratios are also  
399 typical of shade and reduce *cry1* and *cry2* activity (Sellaro et al., 2010), the *cry1* and/or  
400 *cry2* mutations failed to enhance thermotolerance (Figure 1c,f).

401 The acquisition of thermotolerance under low red / far-red ratios requires PIFs  
402 because this response is lost in the *pif1 pif3 pif4 pif5* quadruple mutant (Figure 1b).  
403 Consistently, the activity of PIFs increases when that of phyB is low due either to a  
404 loss-of-function mutation or to low red / far ratios (Leivar & Quail, 2011). The *phyB*  
405 mutation reduced *FAD2*, 5, 6, 7 and 8 transcript levels in plants grown under WL before  
406 exposure to a heat shock (Figure 4a), which could account for the lower level of  
407 polyunsaturated fatty acids in the membranes of this mutant (Figure 3). Low red / far-  
408 red ratios also decreased the expression of at least *FAD2* and 5 (Figure 4b). The activity  
409 of the *FAD7* promoter (Nishiuchi et al., 1995) and the levels of *FAD2* transcripts (Xiao  
410 et al., 2014) are enhanced by light in *Arabidopsis thaliana* and *Brassica napus*,  
411 respectively. Fatty acid desaturation is induced by red light in *Synechosystis* (Kis et al.,  
412 1998; Mironov et al., 2014). The chloroplast membrane of leaf cells contains 75-80% of  
413 unsaturated fatty acids while the membranes of non-photosynthetic tissues typically  
414 bear 60-65% of unsaturated fatty acids (McConn & Browse, 1998). Reactive oxygen

415 species induced by heat stress promotes peroxidation of unsaturated fatty acids,  
416 damaging the membranes (Djanaguiraman, Prasad & Seppanen, 2010). Therefore, the  
417 reduced membrane damage observed in the *phyB* mutant (Figure 2) would be the result  
418 of its reduced expression of selected *FAD* genes (Figure 4) and the consequently low  
419 levels of polyunsaturated fatty acids (Figure 3). Photosynthetic reactions can increase  
420 the oxidative stress caused by heat stress (Djanaguiraman et al., 2010) but the  
421 thermotolerance phenotype of *phyB* is unlikely to result solely from its lower  
422 photosynthetic capacity (Boccalandro et al., 2009) because the *cry1 cry2* mutant also  
423 shows reduced rates of photosynthesis (Boccalandro et al., 2012) and only the *phyB*  
424 mutant exhibited enhanced thermotolerance.

425 In young, etiolated seedlings light-activated phyB also reduced thermotolerance  
426 (Figure 5). In both rosettes and etiolated seedlings, PIFs were required for the enhanced  
427 thermotolerance under the conditions that reduce phyB activity (low red / far-red ratios  
428 and darkness, respectively). Despite these coincidences the two scenarios showed  
429 fundamental differences. Basal thermotolerance was enough for survival of light-grown  
430 seedlings, whilst etiolated seedlings died when exposed to heat stress in the absence of  
431 warm temperature acclimation. Furthermore, in the case of etiolated seedlings no  
432 obvious effects of phyB on membrane lipid composition or electrolyte leakage in  
433 response to heat shock were observed (Figure S2). In etiolated seedlings treated as  
434 reported here, *HSFA1d* and *HSFA1e*, two master heat-shock factors (Yoshida et al.,  
435 2011; Higashi et al., 2013) showed increased expression in response to warm  
436 temperature acclimation in the dark and this effect was significantly reduced by light  
437 (Karayekov et al., 2013). Real time PCR of these heat shock factors on our samples did  
438 not allow us to arrive to a conclusive result, possibly because of the low expression  
439 levels of these genes. However, taking into account the results of Karayekov et al, the  
440 plausible working hypothesis that in etiolated seedlings phyB activity reduces the  
441 tolerance to a heat shock by lowering the expression of *HSFA1d* and *HSFA1e*, induced  
442 by warm temperature acclimation, would require further deep studies.

443 In tomato, low phyB activity due either to far-red light or to the loss-of function  
444 *phyB* mutation increases cold tolerance by increasing *CBFI* transcript levels (Wang et  
445 al., 2016). In *Oryza sativa* the *phyB* mutant shows reduced membrane lipid peroxidation  
446 and increased membrane integrity in response to cold stress (He et al., 2016). Taken  
447 together with the enhanced tolerance to heat stress reported here and elsewhere (Song et  
448 al., 2017), these observations indicate that the *phyB* mutant is less susceptible to both

449 temperature extremes. Several abiotic stress gene markers, including heat-stress genes,  
450 are expressed at higher levels in the *phyB* mutant, which would be more resistant to  
451 abiotic stress (Yang, Seaton, Krahmer & Halliday, 2016).

452 Since radiation load is one of the main controls of the temperature of plant  
453 tissues (Legris et al., 2017), heat stress would be more likely to affect plants fully  
454 exposed to sunlight than plants shaded by neighboring vegetation. Furthermore, heat  
455 stress can be more severe if combined with high light, due to enhanced photo-oxidative  
456 stress (Foyer, Descourvières, Kunert & Descourvières, 1994). Therefore, at first glance  
457 the observation that tolerance to heat stress is higher in plants grown under low red /  
458 far-red ratios typical of shade is counterintuitive. However, a more complete picture is  
459 obtained if not only the probabilities of heat stress but also the costs of thermotolerance  
460 are taken into account. Photosynthesis is favored by membranes relatively rich in  
461 unsaturated fatty acid (McConn & Browse, 1998), which are more susceptible to heat  
462 stress (Routaboul, Skidmore, Wallis & Browse, 2012). Therefore, for a plant grown  
463 under high red / far-red ratios, low thermotolerance might help to optimize the use of  
464 the light resource unless warm temperatures anticipate the likely occurrence of a heat  
465 shock and induce acclimation. Under the low red / far-red ratios of shade,  
466 photosynthesis is limited by light availability and therefore, reducing the level of  
467 unsaturated fatty acids would not come at a significant cost because photosynthesis is  
468 already reduced. In tomato, low red / far-red ratios reduce the photosynthetic capacity of  
469 the stem and the rate of respiration of this organ, in a response that saves energy when  
470 light capture is compromised by shade (Cagnola, Ploschuk, Benech-Arnold, Finlayson  
471 & Casal, 2012). Along the same line, the abundance of proteins involved in chloroplast  
472 biogenesis is reduced in multiple photoreceptor mutants (Fox, Barberini, Ploschuk,  
473 Muschietti & Mazzella, 2015). Furthermore, phytochrome mutants are less affected by  
474 growth-restricting abiotic stresses but this comes at the cost of reduced growth in the  
475 absence of stress (Yang et al., 2016). The emerging picture is that *phyB* activity could  
476 act as a switch between a growth-promoting status to take advantage of the resources in  
477 open places and a more conservative, stress-tolerant mode when the resources for  
478 growth become limited by competition with neighbors.

479

## 480 **5 ACKNOWLEDGMENTS**

481

482 This work was supported by *Agencia Nacional de Promoción Científica y Tecnológica*,  
483 Argentina (PICT 2014-545 to MAM, and PICT-2016-1459 to JJC); and CONICET  
484 Argentina (PIP 2013-2015 num 455 to MAM). We thank Dr. Romina Fox for technical  
485 support with real time PCRs.

486

## 487 **7 REFERENCES**

488

489 Ahmed I.M., Cao F., Zhang M., Chen X., Zhang G. & Wu F. (2013) Difference in Yield  
490 and Physiological Features in Response to Drought and Salinity Combined Stress  
491 during Anthesis in Tibetan Wild and Cultivated Barleys. *PLoS ONE* 8, 1–14.

492 Anderson J.M., Chow W.S. & Park Y. II (1995) The grand design of photosynthesis:  
493 Acclimation of the photosynthetic apparatus to environmental cues. *Photosynthesis*  
494 *Research* 46, 129–139.

495 Bitá C.E. & Gerats T. (2013) Plant tolerance to high temperature in a changing  
496 environment: scientific fundamentals and production of heat stress-tolerant crops.  
497 *Frontiers in Plant Science* 4, 1–18.

498 Bligh E.G. & Dyer W.J. (1959) *Canadian Journal of Biochemistry and Physiology*.  
499 *Canadian Journal of Biochemistry and Physiology* 37, 911–917.

500 Bocalandro H.E., Giordano C. V., Ploschuk E.L., Piccoli P.N., Bottini R. & Casal J.J.  
501 (2012) Phototropins But Not Cryptochromes Mediate the Blue Light-Specific  
502 Promotion of Stomatal Conductance, While Both Enhance Photosynthesis and  
503 Transpiration under Full Sunlight. *Plant Physiology* 158, 1475–1484.

504 Bocalandro H.E., Rugnone M.L., Moreno J.E., Ploschuk E.L., Serna L., Yanovsky  
505 M.J. & Casal J.J. (2009) Phytochrome B Enhances Photosynthesis at the Expense  
506 of Water-Use Efficiency in Arabidopsis. *Plant Physiology* 150, 1083–1092.

507 Burgie E.S. & Vierstra R.D. (2014) Phytochromes: An Atomic Perspective on  
508 Photoactivation and Signaling. *The Plant Cell Online* 26, 4568–4583.

509 Cagnola J.I., Ploschuk E., Benech-Arnold T., Finlayson S.A. & Casal J.J. (2012) Stem  
510 Transcriptome Reveals Mechanisms to Reduce the Energetic Cost of Shade-  
511 Avoidance Responses in Tomato. *Plant Physiology* 160, 1110–1119.

512 Capiati D.A., País S.M. & Téllez-Iñón M.T. (2006) Wounding increases salt tolerance  
513 in tomato plants: Evidence on the participation of calmodulin-like activities in  
514 cross-tolerance signalling. *Journal of Experimental Botany* 57, 2391–2400.

515 Caputo C., Rutitzky M. & Ballaré C.L. (2006) Solar ultraviolet-B radiation alters the



- 516 attractiveness of Arabidopsis plants to diamondback moths (*Plutella xylostella*  
517 L.): impacts on oviposition and involvement of the jasmonic acid pathway. *Journal*  
518 *of Biopesticides* 5, 62–70.
- 519 Casal J.J. (2013) Photoreceptor Signaling Networks in Plant Responses to Shade.  
520 *Annual Review of Plant Biology* 64, 403–427.
- 521 Casal J.J. & Mazzella M. a (1998) Conditional synergism between cryptochrome 1 and  
522 phytochrome B is shown by the analysis of phyA, phyB, and hy4 simple, double,  
523 and triple mutants in Arabidopsis. *Plant physiology* 118, 19–25.
- 524 Crawford A.J., McLachlan D.H., Hetherington A.M. & Franklin K.A. (2012) High  
525 temperature exposure increases plant cooling capacity. *Current Biology* 22, R396–  
526 R397.
- 527 Djanaguiraman M., Boyle D.L., Welti R., Jagadish S.V.K. & Prasad P.V.V. (2018)  
528 Decreased photosynthetic rate under high temperature in wheat is due to lipid  
529 desaturation, oxidation, acylation, and damage of organelles. *BMC Plant Biology*  
530 18, 1–17.
- 531 Djanaguiraman M., Prasad P.V.V. & Seppanen M. (2010) Selenium protects sorghum  
532 leaves from oxidative damage under high temperature stress by enhancing  
533 antioxidant defense system. *Plant Physiology and Biochemistry* 48, 999–1007.
- 534 Duek P., Elmer M., Van Oosten V. & Fankhauser C. (2004) The Degradation of HFR1,  
535 a Putative bHLH Class Transcription Factor Involved in Light Signaling, Is  
536 Regulated by Phosphorylation and Requires COP1. *Current Biology* 14, 2296–  
537 2301.
- 538 Falcone D.L., Ogas J.P. & Somerville C.R. (2004) Regulation of membrane fatty acid  
539 composition by temperature in mutants of Arabidopsis with alterations in  
540 membrane lipid composition. *BMC Plant Biology* 4, 1–45.
- 541 Foreman J., Johansson H., Hornitschek P., Josse E.M., Fankhauser C. & Halliday K.J.  
542 (2011) Light receptor action is critical for maintaining plant biomass at warm  
543 ambient temperatures. *Plant Journal* 65, 441–452.
- 544 Fox A.R., Barberini M.L., Ploschuk E.L., Muschietti J.P. & Mazzella M.A. (2015) A  
545 proteome map of a quadruple photoreceptor mutant sustains its severe  
546 photosynthetic deficient phenotype. *Journal of Plant Physiology* 185, 13–23.
- 547 Foyer C.H., Descourvières P., Kunert K.J. & Descourvières P. (1994) Protection against  
548 oxygen radicals - an important defense-mechanism studied in transgenic plants.  
549 *Plant Cell and Environment* 17, 507–523.

- 550 Franklin K.A. (2003) Phytochromes B, D, and E Act Redundantly to Control Multiple  
551 Physiological Responses in Arabidopsis. *Plant Physiology* 131, 1340–1346.
- 552 Franklin K.A., Lee S.H., Patel D., Kumar S. V., Spartz A.K., Gu C., ... Gray W.M.  
553 (2011) PHYTOCHROME-INTERACTING FACTOR 4 (PIF4) regulates auxin  
554 biosynthesis at high temperature. *Proceedings of the National Academy of Sciences*  
555 108, 20231–20235.
- 556 De Frenne P., Rodríguez-Sánchez F., De Schrijver A., Coomes D.A., Hermy M.,  
557 Vangansbeke P. & Verheyen K. (2015) Light accelerates plant responses to  
558 warming. *Nature Plants* 1, 7–9.
- 559 Gommers C.M.M., Visser E.J.W., Onge K.R.S., Voeselek L.A.C.J. & Pierik R. (2013)  
560 Shade tolerance: When growing tall is not an option. *Trends in Plant Science* 18,  
561 65–71.
- 562 Guo H., Yang H., Mockler T.C. & Lin C. (1998) Regulation of Flowering Time by  
563 *Arabidopsis* Photoreceptors. *Science (New York, N.Y.)* 279, 1360–1363.
- 564 Hatfield J.L. & Prueger J.H. (2015) Temperature extremes: Effect on plant growth and  
565 development. *Weather and Climate Extremes* 10, 4–10.
- 566 He Y., Li Y., Cui L., Xie L., Zheng C., Zhou G., ... Xie X. (2016) Phytochrome B  
567 Negatively Affects Cold Tolerance by Regulating OsDREB1 Gene Expression  
568 through Phytochrome Interacting Factor-Like Protein OsPIL16 in Rice. *Frontiers*  
569 *in Plant Science* 7, 1–12.
- 570 Higashi Y., Ohama N., Ishikawa T., Katori T., Shimura A., Kusakabe K., ... Taji T.  
571 (2013) HsfA1d, a protein identified via FOX hunting using the *Thellungiella salsuginea*  
572 cDNAs improves heat tolerance by regulating heat-stress-responsive gene  
573 expression. *Molecular Plant* 6, 411–422.
- 574 Hong S.-W., Lee U. & Vierling E. (2003) Arabidopsis hot Mutants Define Multiple  
575 Functions Required for Acclimation to High Temperatures. *Plant Physiology* 132,  
576 757–767.
- 577 Hornitschek P., Kohnen M. V., Lorrain S., Rougemont J., Ljung K., López-Vidriero I.,  
578 ... Fankhauser C. (2012) Phytochrome interacting factors 4 and 5 control seedling  
579 growth in changing light conditions by directly controlling auxin signaling. *Plant*  
580 *Journal* 71, 699–711.
- 581 Hornitschek P., Lorrain S., Zoete V., Michielin O. & Fankhauser C. (2009) Inhibition of  
582 the shade avoidance response by formation of non-DNA binding bHLH  
583 heterodimers. *EMBO Journal* 28, 3893–3902.

- 584 Jung J.H., Domijan M., Klose C., Biswas S., Ezer D., Gao M., ... Wigge P.A. (2016)  
585 Phytochromes function as thermosensors in Arabidopsis. *Science* 354, 886–889.
- 586 Karayekov E., Sellaro R., Legris M., Yanovsky M.J. & Casal J.J. (2013) Heat Shock-  
587 Induced Fluctuations in Clock and Light Signaling Enhance Phytochrome B-  
588 Mediated Arabidopsis Deetiolation. *The Plant Cell* 25, 2892–2906.
- 589 Kim S., Hwang G., Lee S., Zhu J.-Y., Paik I., Nguyen T.T., ... Oh E. (2017) High  
590 Ambient Temperature Represses Anthocyanin Biosynthesis through Degradation  
591 of HY5. *Frontiers in Plant Science* 8, 1–11.
- 592 Kis M., Zsiros O., Farkas T., Wada H., Nagy F. & Gombos Z. (1998) Light-induced  
593 expression of fatty acid desaturase genes. *Proceedings of the National Academy of*  
594 *Sciences* 95, 4209–4214.
- 595 Koini M.A., Alvey L., Allen T., Tilley C.A., Harberd N.P., Whitelam G.C. & Franklin  
596 K.A. (2009) High Temperature-Mediated Adaptations in Plant Architecture  
597 Require the bHLH Transcription Factor PIF4. *Current Biology* 19, 408–413.
- 598 Lau O.S., Song Z., Zhou Z., Davies K.A., Chang J., Yang X., ... Bergmann D.C. (2018)  
599 Direct Control of SPEECHLESS by PIF4 in the High-Temperature Response of  
600 Stomatal Development. *Current Biology* 28, 1–8.
- 601 Laubinger S., Fittinghoff K. & Hoecker U. (2004) The SPA quartet: a family of WD-  
602 repeat proteins with a central role in suppression of photomorphogenesis in  
603 arabidopsis. *The Plant cell* 16, 2293–2306.
- 604 Legris M., Klose C., Burgie E.S., Rojas C.C., Neme M., Hiltbrunner A., ... Casal J.J.  
605 (2016) Phytochrome B integrates light and temperature signals in Arabidopsis.  
606 *Science* 354, 897–900.
- 607 Legris M., Nieto C., Sellaro R., Prat S. & Casal J.J. (2017) Perception and signalling of  
608 light and temperature cues in plants. *Plant Journal* 90, 683–697.
- 609 Leivar P. & Monte E. (2014) PIFs: Systems Integrators in Plant Development. *The*  
610 *Plant Cell* 26, 56–78.
- 611 Leivar P., Monte E., Oka Y., Liu T., Carle C.M., Castillon A., ... Quail P.H. (2008)  
612 Multiple phytochrome-interacting bHLH transcription factors repress premature  
613 photomorphogenesis during early seedling development in darkness. *Current*  
614 *Biology* 18, 1815–1823.
- 615 Leivar P. & Quail P.H. (2011) PIFs: Pivotal components in a cellular signaling hub.  
616 *Trends in Plant Science* 16, 19–28.
- 617 Leivar P., Tepperman J.M., Cohn M.M., Monte E., Al-Sady B., Erickson E. & Quail

- 618 P.H. (2012) Dynamic Antagonism between Phytochromes and PIF Family Basic  
619 Helix-Loop-Helix Factors Induces Selective Reciprocal Responses to Light and  
620 Shade in a Rapidly Responsive Transcriptional Network in *Arabidopsis*. *The Plant*  
621 *Cell* 24, 1398–1419.
- 622 Li L., Ljung K., Breton G., Li L., Ljung K., Breton G., ... Chory J. (2012) Linking  
623 photoreceptor excitation to changes in plant architecture Linking photoreceptor  
624 excitation to changes in plant architecture. *Genes & Development* 26, 785–790.
- 625 Liu X. & Huang B. (2000) Heat stress injury in relation to membrane lipid peroxidation  
626 in creeping bentgrass. *Crop Science* 40, 503–510.
- 627 Lorrain S., Allen T., Duek P.D., Whitelam G.C. & Fankhauser C. (2008) Phytochrome-  
628 mediated inhibition of shade avoidance involves degradation of growth-promoting  
629 bHLH transcription factors. *Plant Journal* 53, 312–323.
- 630 Luck J., Spackman M., Freeman A., TreBicki P., Griffiths W., Finlay K. & Chakraborty  
631 S. (2011) Climate change and diseases of food crops. *Plant Pathology* 60, 113–  
632 121.
- 633 Luo X., Lin W., Zhu S., Zhu J., Sun Y., Fan X., ... Wang Z. (2010) NIH Public  
634 AccesIntegration of light and brassinosteroid signaling pathways by a GATA  
635 transcription factor in *Arabidopsis*. *Developmental Cell* 19, 872–883.
- 636 Mazzella M.A., Arana M.V., Staneloni R.J., Perelman S., Rodriguez Batiller M.J.,  
637 Muschietti J., ... Casal J.J. (2005) Phytochrome control of the *Arabidopsis*  
638 transcriptome anticipates seedling exposure to light. *The Plant cell* 17, 2507–2516.
- 639 Mazzella M.A. & Casal J.J. (2001) Interactive signalling by phytochromes and  
640 cryptochromes generates de-etiolation homeostasis in *Arabidopsis thaliana*. *Plant,*  
641 *Cell and Environment* 24, 155–161.
- 642 McConn M. & Browse J. (1998) Polyunsaturated membranes are required for  
643 photosynthetic competence in a mutant of *Arabidopsis*. *Plant Journal* 15, 521–530.
- 644 McNellis T.W. (1994) Overexpression of *Arabidopsis* COP1 Results in Partial  
645 Suppression of Light-Mediated Development: Evidence for a Light-Inactivable  
646 Repressor of Photomorphogenesis. *the Plant Cell Online* 6, 1391–1400.
- 647 Mironov K.S., Sidorov R.A., Kreslavski V.D., Bedbenov V.S., Tsydendambaev V.D. &  
648 Los D.A. (2014) Cold-induced gene expression and  $\omega$ 3 fatty acid unsaturation is  
649 controlled by red light in *Synechocystis*. *Journal of Photochemistry and*  
650 *Photobiology B: Biology* 137, 84–88.
- 651 Mockler T.C., Guo H., Yang H., Duong H. & Lin C. (1999) Antagonistic actions of

- 652 Arabidopsis cryptochromes and phytochrome B in the regulation of floral  
653 induction. *Development (Cambridge, England)* 126, 2073–2082.
- 654 Monte E., Tepperman J.M., Al-Sady B., Kaczorowski K.A., Alonso J.M., Ecker J.R., ...  
655 Quail P.H. (2004) The phytochrome-interacting transcription factor, PIF3, acts  
656 early, selectively, and positively in light-induced chloroplast development.  
657 *Proceedings of the National Academy of Sciences* 101, 16091–16098.
- 658 Nicol J.M., Turner S.J., Coyne D.L., Nijs L. Den & Hockland S. (2011) Genomics and  
659 Molecular Genetics of Plant-Nematode Interactions.
- 660 Nishiuchi T., Nakamura T., Abe T., Kodama H., Nishimura M. & Iba K. (1995) Tissue-  
661 specific and light-responsive regulation of the promoter region of the Arabidopsis  
662 thaliana chloroplast  $\omega$ -3 fatty acid desaturase gene (FAD7). *Plant Molecular*  
663 *Biology* 29, 599–609.
- 664 Pacín M., Legris M. & Casal J.J. (2013) COP1 re-accumulates in the nucleus under  
665 shade. *Plant Journal* 75, 631–641.
- 666 Pacín M., Semmoloni M., Legris M., Finlayson S.A. & Casal J.J. (2016) Convergence  
667 of CONSTITUTIVE PHOTOMORPHOGENESIS 1 and PHYTOCHROME  
668 INTERACTING FACTOR signalling during shade avoidance. *New Phytologist*  
669 211, 967–979.
- 670 Pandey P., Ramegowda V. & Senthil-Kumar M. (2015) Shared and unique responses of  
671 plants to multiple individual stresses and stress combinations: physiological and  
672 molecular mechanisms. *Frontiers in Plant Science* 6, 1–14.
- 673 Park E., Park J., Klim J., Nagatani A., Lagarias J.C. & Choi G. (2012) Phytochrome B  
674 inhibits binding of Phytochrome-Interacting Factors to their target promoters.  
675 *Plant Journal* 72, 537–546.
- 676 Park Y.J., Lee H.J., Ha J.H., Kim J.Y. & Park C.M. (2017) COP1 conveys warm  
677 temperature information to hypocotyl thermomorphogenesis. *New Phytologist* 215,  
678 269–280.
- 679 Pedmale U. V, Huang S.C., Zander M., Cole B.J., Hetzel J., Ljung K., ... Cole B.J.  
680 (2016) Cryptochromes interact directly with PIFs to control plant growth in  
681 limiting blue light. *cell* 164, 233–245.
- 682 Rausenberger J., Tscheuschler A., Nordmeier W., Wüst F., Timmer J., Schäfer E., ...  
683 Hiltbrunner A. (2011) Photoconversion and nuclear trafficking cycles determine  
684 phytochrome A's response profile to far-red light. *Cell* 146, 813–825.
- 685 Reed J.W., Nagatani A., Elich T.D., Fagan M. & Chory J. (1994) Phytochrome A and

- 686 Phytochrome B Have Overlapping but Distinct Functions in Arabidopsis  
687 Development. *Plant physiology* 104, 1139–1149.
- 688 Reed J.W., Nagpal P., Poole D.S., Furuya M. & Chory J. (1993) Mutations in the gene  
689 for the red/far-red light receptor phytochrome B alter cell elongation and  
690 physiological responses throughout Arabidopsis development. *The Plant cell* 5,  
691 147–157.
- 692 Rizhsky L., Liang H. & Mittler R. (2002) The Combined Effect of Drought Stress and  
693 Heat Shock on Gene Expression in Tobacco. *Plant Physiol.* 130, 1143–1151.
- 694 Rousseaux M.C., Julkunen-Tiitto R., Searles P.S., Scopel A.L., Aphalo P.J. & Ballaré  
695 C.L. (2004) Solar UV-B radiation affects leaf quality and insect herbivory in the  
696 southern beech tree *Nothofagus antarctica*. *Oecologia* 138, 505–512.
- 697 Routaboul J.M., Fischer S.F. & Browse J. (2000) Trienoic fatty acids are required to  
698 maintain chloroplast function at low temperatures. *Plant physiology* 124, 1697–  
699 1705.
- 700 Routaboul J.M., Skidmore C., Wallis J.G. & Browse J. (2012) Arabidopsis mutants  
701 reveal that short-and long-term thermotolerance have different requirements for  
702 trienoic fatty acids. *Journal of Experimental Botany* 63, 1435–1443.
- 703 Sellaro R., Crepy M., Trupkin S.A., Karayekov E., Buchovsky A.S., Rossi C. & Casal  
704 J.J. (2010) Cryptochrome as a Sensor of the Blue/Green Ratio of Natural Radiation  
705 in Arabidopsis. *Plant Physiology* 154, 401–409.
- 706 Shanklin J. & Cahoon E.B. (1998) Desaturation and Related Modifications of Fatty  
707 Acids. *Annual Review of Plant Physiology and Plant Molecular Biology* 49, 611–  
708 641.
- 709 Shen W., Li J.Q., Dauk M., Huang Y., Periappuram C., Wei Y. & Zou J. (2010)  
710 Metabolic and transcriptional responses of glycerolipid pathways to a perturbation  
711 of glycerol 3-phosphate metabolism in Arabidopsis. *Journal of Biological*  
712 *Chemistry* 285, 22957–22965.
- 713 Shin J., Park E. & Choi G. (2007) PIF3 regulates anthocyanin biosynthesis in an HY5-  
714 dependent manner with both factors directly binding anthocyanin biosynthetic gene  
715 promoters in Arabidopsis. *Plant Journal* 49, 981–994.
- 716 Song J., Liu Q., Hu B. & Wu W. (2017) Photoreceptor phyB involved in Arabidopsis  
717 temperature perception and heat-tolerance formation. *International Journal of*  
718 *Molecular Sciences* 18, 1194.
- 719 Trupkin S.A., Legris M., Buchovsky A.S., Tolava Rivero M.B. & Casal J.J. (2014)

- 720 Phytochrome B Nuclear Bodies Respond to the Low Red to Far-Red Ratio and to  
721 the Reduced Irradiance of Canopy Shade in Arabidopsis. *Plant Physiology* 165,  
722 1698–1708.
- 723 Wahid A., Gelani S., Ashraf M. & Foolad M.R. (2007) Heat tolerance in plants: An  
724 overview. *Environmental and Experimental Botany* 61, 199–223.
- 725 Wallis J.G. & Browse J. (2002) Mutants of Arabidopsis reveal many roles for  
726 membrane lipids. *Progress in Lipid Research* 41, 254–278.
- 727 Wang F., Guo Z., Li H., Wang M., Onac E., Zhou J., ... Zhou Y. (2016) Phytochrome  
728 A and B Function Antagonistically to Regulate Cold Tolerance via Abscisic Acid-  
729 Dependent Jasmonate Signaling. *Plant Physiology* 170, 459–471.
- 730 Wang P., Song H., Li C., Li P., Li A., Guan H., ... Wang X. (2017) Genome-Wide  
731 Dissection of the Heat Shock Transcription Factor Family Genes in Arachis.  
732 *Frontiers in Plant Science* 8, 1–16.
- 733 Wang Y., Yang L., Zheng Z., Grumet R., Loescher W., Zhu J.K., ... Chan Z. (2013)  
734 Transcriptomic and Physiological Variations of Three Arabidopsis Ecotypes in  
735 Response to Salt Stress. *PLoS ONE* 8, e69036.
- 736 de Wit M., Keuskamp D.H., Bongers F.J., Hornitschek P., Gommers C.M.M., Reinen  
737 E., ... Pierik R. (2016) Integration of Phytochrome and Cryptochrome Signals  
738 Determines Plant Growth during Competition for Light. *Current Biology* 26,  
739 3320–3326.
- 740 Xiao G., Zhang Z.Q., Yin C.F., Liu R.Y., Wu X.M., Tan T.L., ... Guan C.Y. (2014)  
741 Characterization of the promoter and 5'-UTR intron of oleic acid desaturase  
742 (FAD2) gene in Brassica napus. *Gene* 545, 45–55.
- 743 Yang D., Seaton D.D., Krahmer J. & Halliday K.J. (2016) Photoreceptor effects on  
744 plant biomass, resource allocation, and metabolic state. *Proceedings of the*  
745 *National Academy of Sciences* 113, 7667–7672.
- 746 Yángüez E., Castro-Sanz A.B., Fernández-Bautista N., Oliveros J.C. & Castellano  
747 M.M. (2013) Analysis of Genome-Wide Changes in the Translatome of  
748 Arabidopsis Seedlings Subjected to Heat Stress. *PLoS ONE* 8, e71425.
- 749 Yoshida T., Ohama N., Nakajima J., Kidokoro S., Mizoi J., Nakashima K., ...  
750 Yamaguchi-Shinozaki K. (2011) Arabidopsis HsfA1 transcription factors function  
751 as the main positive regulators in heat shock-responsive gene expression.  
752 *Molecular Genetics and Genomics* 286, 321–332.
- 753 Yu X., Liu H., Klejnot J. & Lin C. (2010) The Cryptochrome Blue Light Receptors. *The*

754 *Arabidopsis Book* 8, e0135.

755



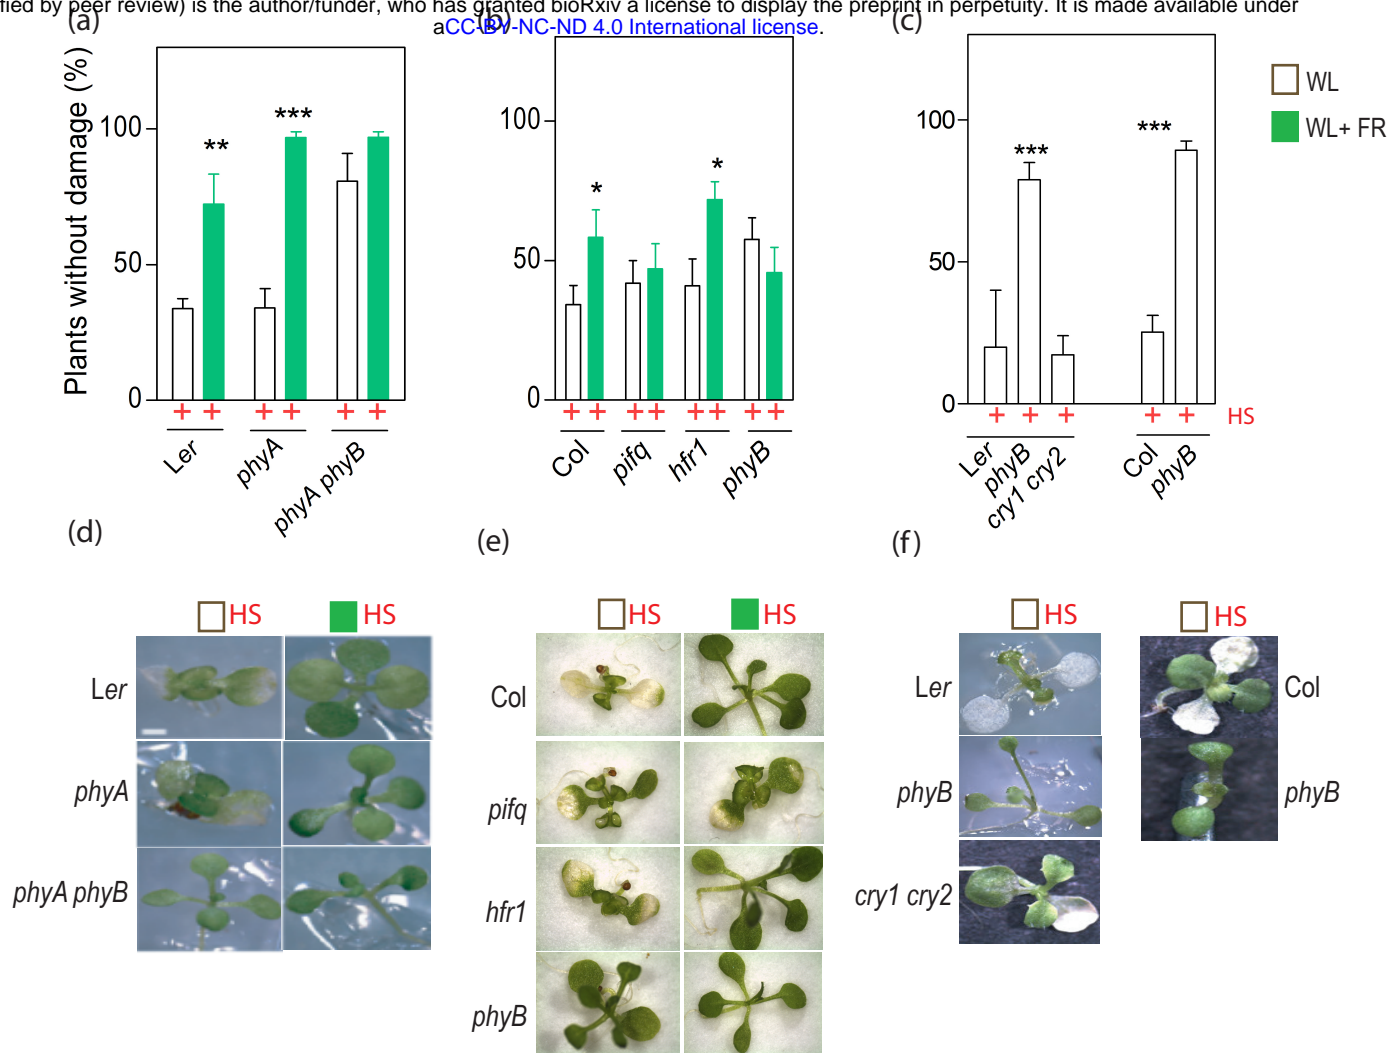

Figure 1. Low red / far-red ratios increase tolerance to a heat shock. Rosettes of the WT and different mutants were grown under WL or WL+FR and exposed to a heat shock (HS) during 45 min at 45 °C (protocol in Figure S1a). (a), (b), (c) Percentage of plants without damage counted 5 d after the heat shock. Data are means of at least 6 independent replicates  $\pm$ SE (each replicate is average of ten plants) . \*, \*\* and \*\*\* indicate significant differences ( $p < 0.05$ ,  $p < 0.01$ ,  $p < 0.001$ , respectively) between WL and WL+FR (a,b) or between a mutant and the WT (c) in ANOVA followed by Bonferroni post-tests. (d), (e), (f) Representative photographs after the heat shock treatments. pifq: pif1 pif3 pif4 pif5 quadruple mutant.

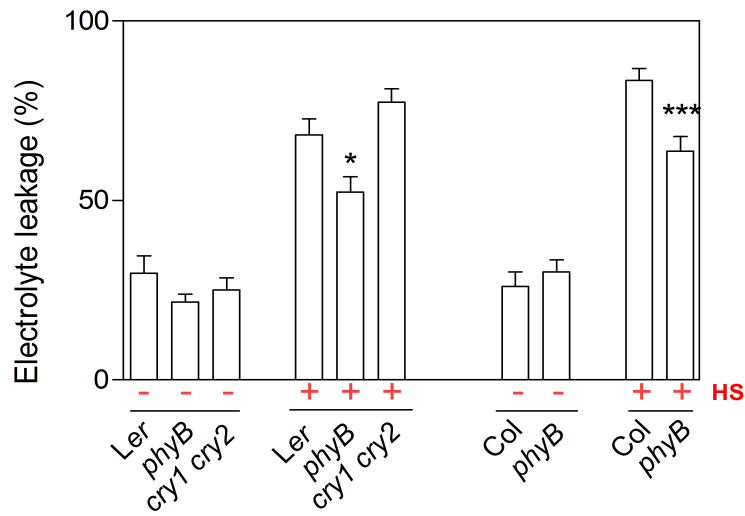

Figure 2. phyB increases electrolyte leakage after a heat shock. Rosettes of the WT and different mutants were grown under WL, either exposed or not exposed to a heat shock (HS) during 45 min at 45 °C and immediately harvested for the measurement of electrolyte leakage (protocol in Figure S1a). Data are the means of at least three independent replicates  $\pm$ SE (each replicate is average of at least twenty plants). \* and \*\*\* indicate significant differences ( $p < 0.05$ ,  $p < 0.001$ , respectively) between a mutant and the WT in ANOVA followed by Bonferroni post-tests. Electrolyte leakage measurements are expressed as a percentage of the leakage achieved after boiling the plants.

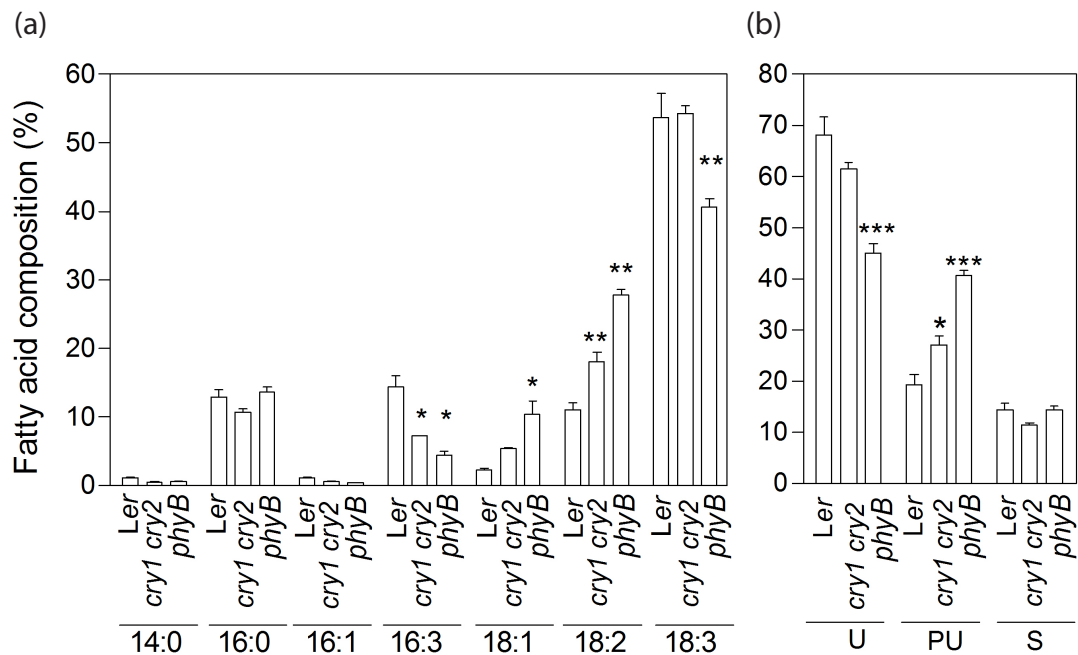

Figure 3. *phyB* increases polyunsaturated fatty acids. Rosettes of the WT and different mutants were grown under WL, and harvested at the time they would have been exposed to a heat shock (protocol in Figure S1a). (a) Total triacylglycerol fatty acid composition. (b) Saturated (S) (14:0 and 16:0), partially unsaturated (PU) (16:1, 18:2 and 18:1) and totally unsaturated (U) (16:3 and 18:3) fatty acid composition. Data are the means of at least three independent replicates  $\pm$ SE (each replicate is average of ten plants). \*, \*\* and \*\*\* indicate significant differences ( $p < 0.05$ ,  $p < 0.01$ ,  $p < 0.001$ , respectively) between a mutant and the WT in ANOVA followed by Bonferroni post-tests.

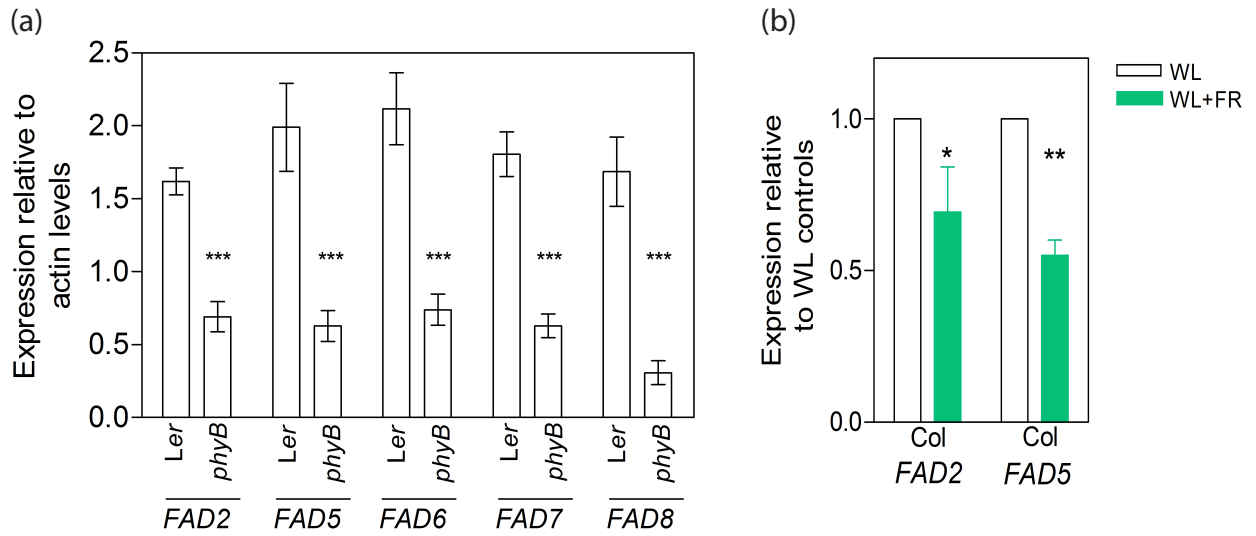

Figure 4. *phyB* increases the expression of FAD genes. Rosettes of the WT and different mutants were grown under WL or WL+FR, and harvested at the time they would have been exposed to a heat shock (HS, protocol in Figure S1a). (a) Effect of the *phyB* mutation under WL. (b) Effect of WL+FR compared to WL. Data are the means of at least three independent replicates  $\pm$ SE. \*, \*\* and \*\*\* indicates significant differences ( $p < 0.05$ ,  $p < 0.01$  and  $p < 0.001$  respectively) in ANOVA followed by Bonferroni post-tests.

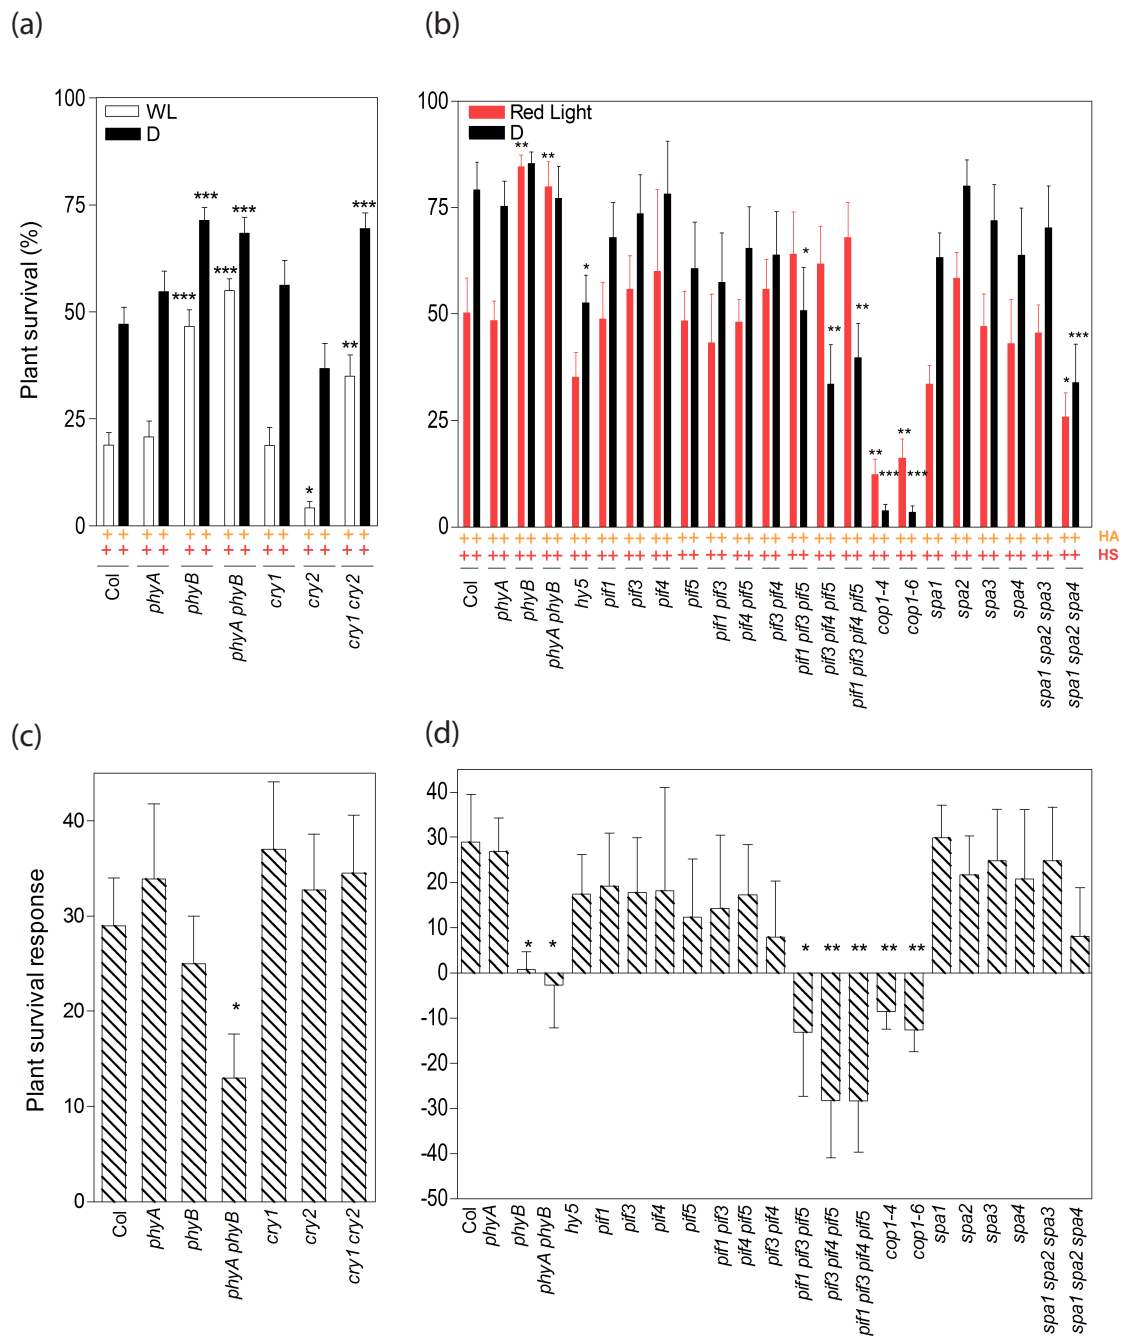

Figure 5. *phyB* reduces tolerance to a heat shock in etiolated seedlings. Etiolated seedlings were given a heat acclimation (HA) pre-treatment (35 °C) and either grown in complete darkness or exposed to light periods before a heat shock (HS) of 45 °C during 90 min followed by a recovery period (protocol in Figure S1b). Survival rates in response to WL (a), or red light (b). (c), (d) Difference in plant survival between seedlings acclimated by warm temperatures either exposed or not exposed to light. Data are the means of at least six independent replicates  $\pm$ SE (each replicate is average of ten plants). \*, \*\* and \*\*\* indicate significant differences ( $p < 0.05$ ,  $p < 0.01$ ,  $p < 0.001$ , respectively) between a mutant and the WT in ANOVA followed by Bonferroni post-tests.
